# Supplementary material for: Systematic characterization of selenium speciation in coal fly ash
Source: Royal Society of Chemistry journal article supplement (doi:10.1039/d4em00398e), 2024-01-01
Supplement: d4em00398e1.pdf [file d4em00398e1.pdf]

1 **Supporting Information**

2  
3 **Systematic Characterization of Selenium Speciation in Coal Fly Ash**

4  
5 Estefania Garcia<sup>1</sup>, Pan Liu<sup>1</sup>, Sharon Bone<sup>2</sup>, Yinghao Wen<sup>1</sup>, Yuanzhi Tang<sup>1\*</sup>

6  
7 <sup>1</sup>School of Earth and Atmospheric Sciences, Georgia Institute of Technology, 311 Ferst Dr.,  
8 Atlanta, Georgia 30332, USA

9 <sup>2</sup>Stanford Linear Accelerator Center, SLAC National Accelerator Laboratory, 2575 Sand Hill  
10 Rd, Menlo Park, CA 94025, USA

11  
12 \*Corresponding author:

13 Yuanzhi Tang

14 Email: [yuanzhi.tang@eas.gatech.edu](mailto:yuanzhi.tang@eas.gatech.edu)

15 Phone: 404-894-3814

16

17 **Text S1. Statistical Analysis**

18 R-studio was used for principal component analysis (PCA). Principal component analysis  
19 was also performed in R-studio for samples 1-14, 1B, and 2S with respect to Al<sub>2</sub>O<sub>3</sub>, SiO<sub>2</sub>, FeO,  
20 CaO, LOI, average particle size, Se concentration, Se(0)%, Se(IV)%, and Se(VI)%.<sup>1</sup> To determine  
21 which principal components (PCs) held a majority of the variance within this data set, scree plot  
22 and eigen values were used. The scree plot in Fig. S5 shows PCs above the blue dashed line hold  
23 a majority of the variability, in this case PCs 1 and 2. Additionally eigen values for each PC are  
24 shown in Table S5, by squaring their standard deviations. The Kaiser criterion was used to  
25 determine the significance of each component, where eigen values >1 are significant. Based on  
26 this, PCs 1 and 2 are significant in capturing the variance, with eigen values of 3.91 and 3.56. A  
27 summary of PCA results is shown in Table S6, with a complete list of loadings for each PC in  
28 Table S7. The significance of each variable to each PC may be assessed by the loadings value  
29 (ranging from ±1, a value closer to ±1 indicates a strong relationship), to determine the significance  
30 of a loading the following formula was used:

31 
$$\sqrt{\frac{1}{ncol(mydata)}} \text{ ref } 2$$

32 This produced a value of 0.30, therefore loadings ± 0.30 were considered significant for that  
33 particular PC. Lastly, to better interpret the significance of each variable to each component, a  
34 varimax rotation was applied. From Table S10, loadings for PC1-2 were < ± 0.4683, after varimax  
35 rotation values were ±1.

36 **Table S1.** Sample information on coal source, type, and combustion conditions.<sup>3</sup>  
 37

| Sample ID | Coal source <sup>a</sup> | Coal type              | Class | Furnace type | SOx control | NOx control | Particulate matter control |
|-----------|--------------------------|------------------------|-------|--------------|-------------|-------------|----------------------------|
| 1         | PRB                      | Sub.                   | C     | Opposed      |             |             | ESPc                       |
| 2         | PRB                      | Sub.                   | C     | Opposed      |             |             | ESPc                       |
| 3         | PRB                      | Sub.                   | F     | Opposed      |             |             | ESPc                       |
| 4         | PRB                      | Sub.                   | C     | Opposed      |             |             | ESPc                       |
| 5         | PRB                      | Sub.                   | C     | Opposed      |             |             | ESPc                       |
| 6         | PRB                      | Sub.                   | C     | Opposed      |             |             | ESPc                       |
| 7         | PRB                      | Sub.                   | C     | Opposed      |             |             | ESPc                       |
| 8         | PRB                      | Sub.                   | C     | Opposed      |             |             | ESPc                       |
| 9         | PRB+MSW                  | 85% Sub. +<br>15% Bit. | F     | Tangent      |             |             | ESPc                       |
| 10        | ILB                      | Bit.                   | F     | Tangent      | WFGD        |             | ESPc + BH                  |
| 11        | ILB                      | Bit.                   | F     | Opposed      | WFGD        |             | ESPc + BH                  |
| 12        | ILB                      | Bit.                   | F     | Opposed      | WFGD        |             | ESPc + BH                  |
| 13        | N. App.                  | Bit.                   | F     | Opposed      |             | SCR         | ESP                        |
| 14        | N. App.                  | Bit.                   | F     | Opposed      |             | SCR         | ESP                        |
| 1B        | ILB                      | Bit.                   | F     | Tangent      | WFGD        | SCR         | ESPc/BH                    |
| 2S        | PRB                      | Sub.                   | C     | Tangent      | WFGD        | SCR         | BH                         |
| 90        | Surface mine in Co.      | Sub.                   | F     |              |             |             |                            |
| 91        | PRB                      | Sub.                   | C     |              |             |             |                            |
| F         | ILB                      | Bit.                   | F     |              |             |             |                            |

38  
 39 <sup>a</sup> PRB: Powder River Basin, MSW: Municipal solid waste, ILB: Illinois basin, N. App.: North Appalachia,  
 40 Sub.: subbituminous, Bit.: bituminous, WFGD: wet flue gas desulfurization, SCR: selective catalytic  
 41 reduction, ESP(c): electrostatic precipitator (cold side), and BH: baghouse.

42 **Table S2.** Information on model compounds and sources.

43

| Oxidation State | Model Compounds                              | Source                                                                                                                                                                                                                                      |
|-----------------|----------------------------------------------|---------------------------------------------------------------------------------------------------------------------------------------------------------------------------------------------------------------------------------------------|
| Se(0)           | Se foil                                      | APS, beamline 12-BM                                                                                                                                                                                                                         |
| Se(IV)          | CaSeO <sub>3</sub>                           | Pfaltz & Bauer                                                                                                                                                                                                                              |
|                 | SeO <sub>2</sub>                             | Sigma Aldrich                                                                                                                                                                                                                               |
|                 | Se(IV) doped in FeOx                         | 0.1 M Na <sub>2</sub> SeO <sub>3</sub> and 0.2 M FeCl <sub>3</sub> were mixed into 15 mL of MQ water. This mixture was titrated with NaOH until a pH of 7 was reached. The product was rinsed and centrifuged.                              |
|                 | Se(IV) adsorbed on lime (CaCO <sub>3</sub> ) | 5 mM Na <sub>2</sub> SeO <sub>3</sub> and 100 mg calcite was dissolved to a total volume of 20 mL. 10 mM of NaCl was added until pH 6.0 was reached. The mixture reacted for 24 hours and was syringed filtered with a 0.45 μm filter.      |
|                 | Se(IV) adsorbed on FeOx                      | 5 mM Na <sub>2</sub> SeO <sub>3</sub> and 100 mg ferrihydrite was dissolved to a total volume of 20 mL. 10 mM of NaCl was added until pH 6.0 was reached. The mixture reacted for 24 hours and was syringed filtered with a 0.45 μm filter. |
| Se(VI)          | Se(VI) adsorbed on FeOx                      | 5 mM Na <sub>2</sub> SeO <sub>4</sub> and 100 mg ferrihydrite was dissolved to a total volume of 20 mL. 10 mM of NaCl was added until pH 6.0 was reached. The mixture reacted for 24 hours and was syringed filtered with a 0.45 μm filter. |
|                 | Se(VI) doped in FeOx                         | 0.1 M Na <sub>2</sub> SeO <sub>4</sub> and 0.2 M FeCl <sub>3</sub> were mixed into 15 mL of MQ water. This mixture was titrated with NaOH until a pH of 7 was reached. The product was rinsed and centrifuged.                              |
|                 | Na <sub>2</sub> SeO <sub>4</sub>             | Alfa Aesar                                                                                                                                                                                                                                  |

44

45

46 **Table S3.** Summary of characterization techniques for each sample.<sup>3</sup>

47

| Sample ID | XRD | SEM/EDX | ICP-MS | XRF | XANES | $\mu$ -XRF and $\mu$ -XANES | Particle Size analysis | Density analysis |
|-----------|-----|---------|--------|-----|-------|-----------------------------|------------------------|------------------|
| 1         | X   |         | X      | X   | X     |                             | X                      | X                |
| 2         | X   |         | X      | X   | X     | X                           | X                      | X                |
| 3         | X   | X       | X      | X   | X     |                             | X                      | X                |
| 4         | X   | X       | X      | X   | X     |                             | X                      | X                |
| 5         | X   | X       | X      | X   | X     |                             | X                      | X                |
| 6         | X   |         | X      | X   | X     |                             | X                      | X                |
| 7         | X   |         | X      | X   | X     |                             | X                      | X                |
| 8         | X   | X       | X      | X   | X     | X                           | X                      | X                |
| 9         | X   | X       | X      | X   | X     | X                           | X                      | X                |
| 10        | X   |         | X      | X   | X     | X                           | X                      | X                |
| 11        | X   |         | X      | X   | X     |                             | X                      | X                |
| 12        | X   | X       | X      | X   | X     | X                           | X                      | X                |
| 13        | X   | X       | X      | X   | X     |                             | X                      | X                |
| 14        | X   |         | X      | X   | X     |                             | X                      | X                |
| 1B        | X   | X       | X      | X   | X     | X                           | X                      | X                |
| 2S        | X   | X       | X      | X   | X     | X                           | X                      | X                |
| 90        | X   |         | X      | X   | X     |                             | X                      | X                |
| 91        | X   |         | X      | X   | X     |                             | X                      | X                |
| F         | X   | X       | X      | X   | X     |                             | X                      | X                |

48

49 **Table S4.** Composition and physical properties of all CFA samples.<sup>3</sup> Normalized major elements  
 50 for XRF. Samples 90 and 91 are Standard Reference Materials 2690 and 2691 from the National  
 51 Institute of Standards and Technology. Major element composition for sample F is from Renew  
 52 et al.<sup>4</sup> Residual standard deviation used for ICP. NM – not measured.  
 53

| Sample ID | Major element (wt%)            |                                |                  |              | Class | Se (ppm)     | Average particle size ( $\mu\text{m}$ ) | Surface Area ( $\text{cm}^2/\text{cm}^3$ ) | Bulk density (mg/cc) | LOI  |
|-----------|--------------------------------|--------------------------------|------------------|--------------|-------|--------------|-----------------------------------------|--------------------------------------------|----------------------|------|
|           | Fe <sub>2</sub> O <sub>3</sub> | Al <sub>2</sub> O <sub>3</sub> | SiO <sub>2</sub> | CaO          |       |              |                                         |                                            |                      |      |
| 1         | 5.27                           | 20.49                          | 38.95            | 19.72        | C     | 11.8 ± 0.68  | 13.2                                    | 9724.7                                     | 2.63                 | 1.75 |
| 2         | 5.26                           | 20.06                          | 40.92            | 18.65        | C     | 9.4 ± 2.07   | 12.7                                    | 8917.9                                     | 2.56                 | 0.91 |
| 3         | 6.73                           | 16.88                          | 49.12            | 15.6         | F     | 5.2 ± 2.31   | 51.4                                    | 4271.7                                     | 2.53                 | 0.86 |
| 4         | 5.44                           | 19.99                          | 40.2             | 19.19        | C     | 9.9 ± 2.27   | 11.5                                    | 9735.4                                     | 2.59                 | 1.05 |
| 5         | 5.69                           | 20.95                          | 41.18            | 17.56        | C     | 10.3 ± 0.95  | 14.0                                    | 9972.8                                     | 2.59                 | 0.76 |
| 6         | 5.66                           | 21.07                          | 40.82            | 17.73        | C     | 10.3 ± 0.29  | 13.5                                    | 9780.5                                     | 2.57                 | 0.71 |
| 7         | 5.28                           | 20.46                          | 38.91            | 19.79        | C     | 10.2 ± 0.22  | 10.1                                    | 10022                                      | 2.61                 | 0.95 |
| 8         | 5.68                           | 20.9                           | 41.17            | 17.52        | C     | 10.2 ± 0.83  | 13.7                                    | 9867.3                                     | 2.56                 | 0.66 |
| 9         | 9.84                           | 21.84                          | 44.45            | 17.07        | F     | 10.1 ± 0.51  | 21.2                                    | 9233.7                                     | 2.56                 | 3.41 |
| 10        | 9.95                           | 11.24                          | 24.13            | 51.61        | -     | 260.6 ± 0.58 | 8.3                                     | 16478                                      | 2.53                 | 9.72 |
| 11        | 30.26                          | 17.42                          | 42.12            | 8.49         | F     | 4.4 ± 3.2    | 107.5                                   | 892.15                                     | 2.41                 | 1.66 |
| 12        | 15.87                          | 19.15                          | 46.36            | 13.31        | F     | 8.8 ± 0.93   | 17.4                                    | 7314.3                                     | 2.48                 | 2.43 |
| 13        | 24.13                          | 22.89                          | 42.9             | 7.47         | F     | 5.9 ± 0.71   | 41.3                                    | 3623.2                                     | 2.56                 | 8.86 |
| 14        | 28.36                          | 21.48                          | 40.92            | 7.49         | F     | 5.6 ± 3.1    | 42.6                                    | 3514.8                                     | 2.69                 | 3.96 |
| 1B        | 17.48                          | 22.56                          | 51.04            | 4.94         | F     | 9.4 ± 1.93   | 30.2                                    | 4996.1                                     | 2.37                 | 0.42 |
| 2S        | 6.22                           | 17.14                          | 37.78            | 28.68        | C     | 13.5 ± 0.34  | 23.9                                    | 7017.8                                     | 2.69                 | 3.07 |
| 90        | 5.11 ± 0.06                    | 23.30 ± 0.28                   | 55.29 ± 0.17     | 8.00 ± 0.13  | F     | 0.8          | NM                                      | NM                                         | NM                   | 0.53 |
| 91        | 6.32 ± 0.03                    | 18.53 ± 0.39                   | 36.00 ± 0.12     | 25.81 ± 0.32 | C     | 17           | NM                                      | NM                                         | NM                   | 0.23 |
| F         | 11.90                          | 25.20                          | 54.30            | 1.60         | F     | NM           | NM                                      | NM                                         | NM                   | NM   |

54  
 55  
 56  
 57  
 58  
 59  
 60  
 61  
 62  
 63  
 64  
 65  
 66  
 67  
 68  
 69  
 70  
 71  
 72  
 73  
 74  
 75

76

**Table S5.** Linear combination fitting results of Se bulk XANES.

| Sample ID | Se(0)%     | Se(IV)%            |                  |                   |                         |                         | Se(VI)%                 | Sum   | R-factor |
|-----------|------------|--------------------|------------------|-------------------|-------------------------|-------------------------|-------------------------|-------|----------|
|           |            | CaSeO <sub>3</sub> | SeO <sub>2</sub> | Se(IV) doped FeOx | Se(IV) adsorbed on lime | Se(IV) adsorbed on FeOx | Se(VI) adsorbed on FeOx |       |          |
| 1         |            | 79.0 ± 1.2         |                  |                   |                         |                         | 24.4 ± 1.2              | 103.4 | 0.0074   |
| 2         |            |                    | 34.7 ± 1.4       | 28.0 ± 0.6        |                         |                         | 40.8 ± 1.1              | 103.6 | 0.0067   |
| 3         |            | 88.5 ± 1.9         |                  |                   |                         |                         | 20.5 ± 1.9              | 109.0 | 0.0160   |
| 4         |            | 81.4 ± 1.2         |                  |                   |                         |                         | 22.4 ± 1.2              | 103.8 | 0.0070   |
| 5         | 15.9 ± 0.9 |                    |                  | 22.5 ± 0.5        |                         |                         | 63.8 ± 0.9              | 102.3 | 0.0058   |
| 6         |            |                    | 20.8 ± 1.5       | 19.9 ± 0.7        |                         |                         | 63.3 ± 1.2              | 104.0 | 0.0072   |
| 7         |            | 78.5 ± 1.1         |                  |                   |                         |                         | 24.1 ± 1.1              | 102.6 | 0.0058   |
| 8         | 14.7 ± 1.0 |                    |                  | 22.0 ± 0.5        |                         |                         | 65.6 ± 1.0              | 102.3 | 0.0061   |
| 9         |            | 65.2 ± 3.6         |                  | 10.1 ± 1.7        |                         |                         | 28.4 ± 2.0              | 103.7 | 0.0100   |
| 10        | 13.1 ± 0.7 | 72.1 ± 0.8         |                  |                   |                         |                         | 13.9 ± 0.7              | 99.1  | 0.0030   |
| 11        | 46.0 ± 2.4 |                    |                  | 27.7 ± 1.3        |                         |                         | 33.3 ± 2.4              | 107.1 | 0.0415   |
| 12        | 47.3 ± 1.4 |                    |                  | 26.8 ± 0.8        |                         |                         | 31.5 ± 1.4              | 105.7 | 0.0160   |
| 13        | 90.7 ± 1.3 |                    |                  | 18.3 ± 0.9        |                         |                         |                         | 108.9 | 0.0538   |
| 14        | 89.9 ± 1.3 |                    |                  | 16.9 ± 0.8        |                         |                         |                         | 106.8 | 0.0554   |
| 2S        | 11.9 ± 0.7 |                    |                  |                   | 64.0 ± 0.6              |                         | 23.2 ± 0.6              | 99.1  | 0.0041   |
| 91        |            | 42.3 ± 8.8         |                  |                   |                         | 28.2 ± 4.4              | 34.5 ± 4.1              | 105.1 | 0.0227   |
| F         |            |                    | 56.7 ± 2.4       |                   | 18.9 ± 1.5              |                         | 28.3 ± 1.1              | 103.9 | 0.0073   |

Commented [TY1]: Move to SI and update text

77  
78  
79  
80  
81  
82  
83  
84  
85  
86  
87  
88  
89  
90  
91  
92  
93  
94  
95  
96

97 **Table S6.** LCF results for Se K-edge  $\mu$ -XANES. The first number of the hot spot label corresponds to CFA sample number.  
 98  
 99

Commented [TY2]: Move to SI and update text

| Hot spot  | Se(IV) %           |                         |                         | Se(VI) %                |                                  | Sum   | R-Factor |
|-----------|--------------------|-------------------------|-------------------------|-------------------------|----------------------------------|-------|----------|
|           | CaSeO <sub>3</sub> | Se(IV) adsorbed on lime | Se(IV) adsorbed on FeOx | Se(VI) adsorbed on FeOx | Na <sub>2</sub> SeO <sub>4</sub> |       |          |
| 2_R5_003  |                    |                         |                         | 16.0 ± 5.9              | 99.2 ± 6.3                       | 115.2 | 0.0186   |
| 9_001     | 19.6 ± 0.9         |                         |                         | 77.7 ± 0.9              |                                  | 97.3  | 0.0080   |
| 10_R1_001 | 43.0 ± 2.0         |                         |                         |                         | 53.0 ± 2.1                       | 96.0  | 0.0641   |
| 10_R1_002 | 46.5 ± 4.4         |                         |                         |                         | 47.7 ± 4.6                       | 94.2  | 0.3138   |
| 10_R1_003 | 52.5 ± 3.1         |                         |                         |                         | 36.0 ± 3.3                       | 88.5  | 0.1932   |
| 10_R1_004 | 43.7 ± 1.7         |                         |                         | 54.9 ± 1.7              |                                  | 98.6  | 0.0297   |
| 10_R2_001 | 56.9 ± 4.0         |                         |                         |                         | 31.4 ± 4.3                       | 88.3  | 0.3123   |
| 10_R2_002 | 50.3 ± 1.5         |                         |                         |                         | 50.6 ± 1.5                       | 100.9 | 0.0284   |
| 10_R2_003 | 36.4 ± 1.9         |                         |                         | 71.6 ± 1.9              |                                  | 108.0 | 0.0274   |
| 10_R3_001 | 37.3 ± 1.8         |                         |                         | 61.8 ± 1.8              |                                  | 99.4  | 0.0293   |
| 10_R3_02  | 27.1 ± 1.7         |                         |                         |                         | 67.3 ± 1.8                       | 94.4  | 0.0432   |
| 10_R3_003 | 33.4 ± 1.9         |                         |                         |                         |                                  | 98.9  | 0.0337   |
| 12_R2     |                    | 53.9 ± 0.9              |                         |                         | 46.5 ± 1.0                       | 100.4 | 0.0149   |
| 12_001    | 39.2 ± 0.8         |                         |                         | 17.3 ± 3.3              | 42.4 ± 3.3                       | 98.9  | 0.0064   |
| 12_002    |                    | 55.6 ± 1.3              |                         |                         | 43.2 ± 1.4                       | 98.8  | 0.0358   |
| 12_003    |                    | 56.6 ± 1.3              |                         |                         | 42.4 ± 1.4                       | 99.0  | 0.0346   |
| 1B_Se5    | 58.7 ± 3.3         |                         |                         |                         | 40.7 ± 3.4                       | 99.4  | 0.0683   |
| 1B_Se6    |                    |                         | 38.4 ± 1.8              | 64.6 ± 2.0              |                                  | 103.0 | 0.0380   |
| 1B_Se7    | 65.3 ± 2.6         |                         |                         | 33.3 ± 2.6              |                                  | 98.6  | 0.0280   |
| 2S_Se4    | 48.5 ± 2.2         |                         |                         |                         | 52.0 ± 2.2                       | 100.6 | 0.0242   |
| 2S_Se3    | 43.0 ± 2.1         |                         |                         |                         | 57.8 ± 2.2                       | 100.8 | 0.0255   |
| 2S_Se2    | 53.5 ± 2.8         |                         |                         |                         | 44.4 ± 2.9                       | 97.9  | 0.0466   |
| 2S_Se1    | 60.4 ± 2.0         |                         |                         |                         | 39.2 ± 2.0                       | 99.5  | 0.0201   |

100  
101



102  
103  
104  
105  
106  
107

**Table S7.** Eigen values for each component in PCA, by squaring the standard deviation. PCs with values >1 are considered significant.

| PC   | Eigen Value |
|------|-------------|
| PC1  | 3.91        |
| PC2  | 3.56        |
| PC3  | 0.94        |
| PC4  | 0.85        |
| PC5  | 0.43        |
| PC6  | 0.13        |
| PC7  | 0.09        |
| PC8  | 0.05        |
| PC9  | 0.04        |
| PC10 | 0.00        |

108  
109  
110  
111  
112  
113

**Table S8.** Summary of PCA with standard deviation, proportion of variance, and cumulative proportion of variance for each principal component (PCs).

| Principal Component | Standard Deviation | Proportion of Variance | Cumulative Proportion |
|---------------------|--------------------|------------------------|-----------------------|
| PC1                 | 1.977              | 0.391                  | 0.391                 |
| PC2                 | 1.8864             | 0.3559                 | 0.7469                |
| PC3                 | 0.96763            | 0.09363                | 0.84052               |
| PC4                 | 0.92214            | 0.08503                | 0.92555               |
| PC5                 | 0.65291            | 0.04263                | 0.96818               |
| PC6                 | 0.36402            | 0.01325                | 0.98143               |
| PC7                 | 0.30478            | 0.00929                | 0.99072               |
| PC8                 | 0.22831            | 0.00521                | 0.99593               |
| PC9                 | 0.20165            | 0.00407                | 1                     |
| PC10                | 2.16E-08           | 0.00E+00               | 1.00E+00              |

114  
115  
116  
117  
118  
119  
120  
121

122 **Table S9.** Loadings for each PC and variable.  
 123

| PC   | FeO   | CaO   | Al <sub>2</sub> O <sub>3</sub> | SiO <sub>2</sub> | Average particle size | Se concentration | Se(0) | Se(IV) | Se(VI) | LOI   |
|------|-------|-------|--------------------------------|------------------|-----------------------|------------------|-------|--------|--------|-------|
| PC1  | 0.46  | -0.27 | -0.28                          | -0.27            | 0.29                  | 0.14             | 0.42  | -0.24  | -0.32  | 0.35  |
| PC2  | -0.19 | 0.43  | -0.37                          | -0.41            | -0.21                 | 0.47             | -0.13 | 0.30   | -0.02  | 0.31  |
| PC3  | 0.03  | -0.06 | -0.09                          | 0.20             | 0.32                  | -0.13            | -0.23 | 0.62   | -0.62  | -0.08 |
| PC4  | -0.06 | -0.10 | 0.40                           | 0.07             | -0.67                 | -0.02            | 0.13  | -0.03  | -0.50  | 0.31  |
| PC5  | 0.20  | -0.20 | -0.12                          | 0.15             | -0.12                 | 0.49             | -0.60 | -0.40  | -0.21  | -0.25 |
| PC6  | -0.07 | -0.13 | 0.38                           | 0.22             | 0.35                  | 0.19             | -0.31 | 0.03   | 0.23   | 0.69  |
| PC7  | 0.15  | -0.10 | 0.55                           | -0.74            | 0.12                  | 0.02             | -0.19 | 0.11   | -0.02  | -0.23 |
| PC8  | -0.49 | 0.41  | 0.20                           | 0.00             | 0.40                  | 0.14             | 0.17  | -0.42  | -0.39  | -0.10 |
| PC9  | 0.01  | -0.16 | 0.24                           | 0.23             | 0.03                  | 0.67             | 0.46  | 0.32   | 0.12   | -0.28 |
| PC10 | 0.66  | 0.68  | 0.23                           | 0.21             | 0.00                  | 0.00             | 0.00  | 0.00   | 0.00   | 0.00  |

124

125 **Table S10.** FeO content for CFA samples.  
126

| Sample ID | FeO (wt%) |
|-----------|-----------|
| 1         | 4.720954  |
| 2         | 4.70542   |
| 3         | 6.023256  |
| 4         | 4.870642  |
| 5         | 5.089477  |
| 6         | 5.068768  |
| 7         | 4.723226  |
| 8         | 5.083602  |
| 9         | 8.805308  |
| 10        | 8.91      |
| 11        | 27.08938  |
| 12        | 14.20713  |
| 13        | 21.59544  |
| 14        | 25.3878   |
| 1B        | 15.65     |
| 2S        | 5.57      |

127  
128

129 **Table S11.** Loading values after varimax rotation.  
 130

| PC                             | PC1 | PC2 | PC3 | PC4 | PC5 | PC6 | PC7 | PC8 | PC9 | PC10 |
|--------------------------------|-----|-----|-----|-----|-----|-----|-----|-----|-----|------|
| FeO                            | 1   | -   | -   | -   | -   | -   | -   | -   | -   | -    |
| CaO                            | -   | -   | -   | -   | -   | -   | -   | -   | -   | 1    |
| Al <sub>2</sub> O <sub>3</sub> | -   | -1  | -   | -   | -   | -   | -   | -   | -   | -    |
| SiO <sub>2</sub>               | -   | -   | -   | -   | -   | -   | -1  | -   | -   | -    |
| Average particle size          | -   | -   | -   | -1  | -   | -   | -   | -   | -   | -    |
| Se concentration               | -   | -   | -   | -   | -   | -   | -   | -   | 1   | -    |
| Se(0)                          | -   | -   | -   | -   | -1  | -   | -   | -   | -   | -    |
| Se(IV)                         | -   | -   | 1   | -   | -   | -   | -   | -   | -   | -    |
| Se(VI)                         | -   | -   | -   | -   | -   | -   | -   | -1  | -   | -    |
| LOI                            | -   | -   | -   | -   | -   | 1   | -   | -   | -   | -    |

131  
 132

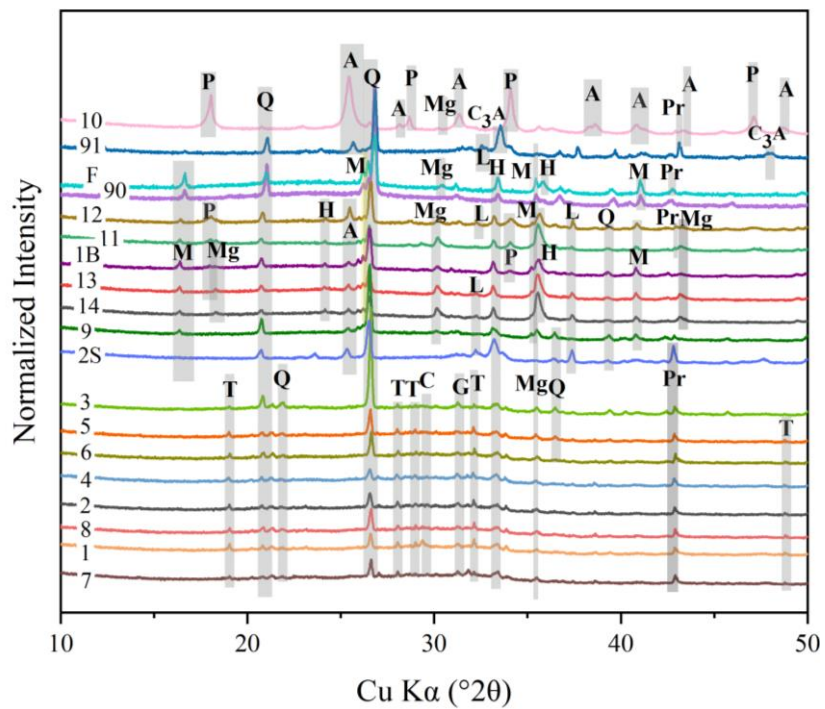

133  
 134  
 135 **Figure S1.** XRD spectra of all samples, normalized by quartz (101) peak. Mineral phases are  
 136 shown as vertical gray bars. Thenardite (T), Mullite (M), Quartz (Q), Hematite (H), Anhydrite (A),  
 137 Magnetite (Mg), Calcite (C), Periclase (Pr), Gehlenite (G), Lime (L), Portlandite (P), and  
 138 tricalcium aluminate (C<sub>3</sub>A).<sup>3</sup>  
 139

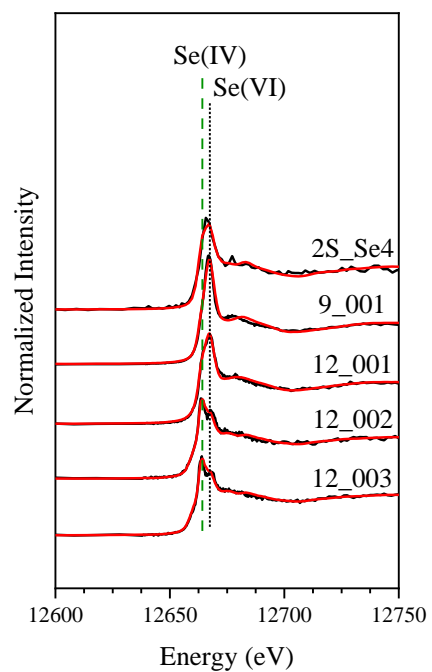

140  
 141 **Figure S2.** Se K-edge  $\mu$ -XANES spectra (black lines) and LCF fitted spectra (red lines) for hot  
 142 spots from samples 2S, 9, and 12. Vertical dashed lines represent the edge peak positions for  
 143 Se(IV) and Se(VI) adsorbed on FeOx in green and gray.

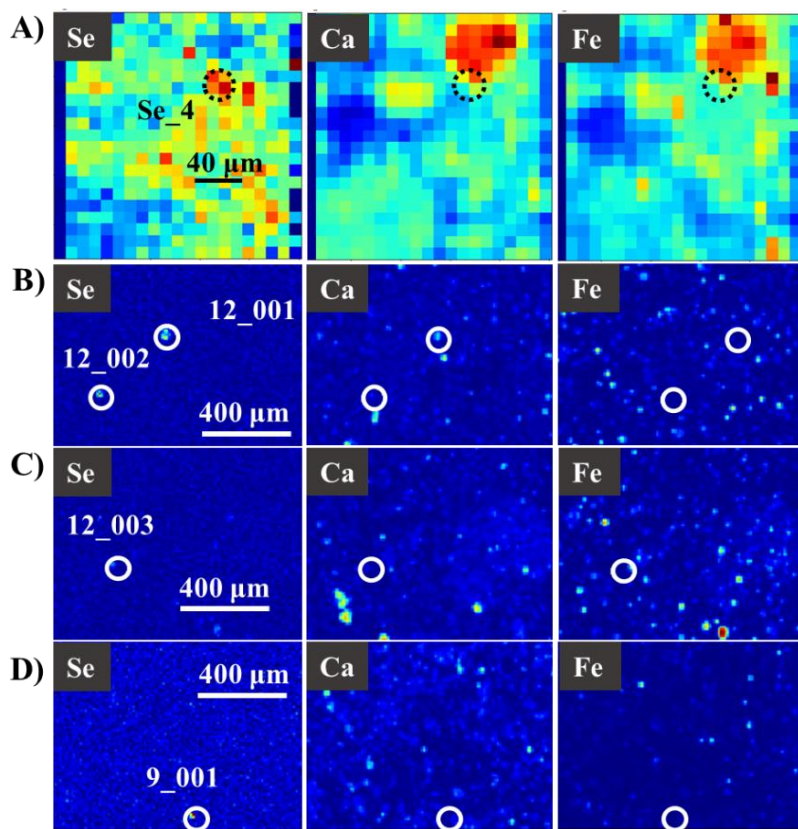

144  
 145  
 146 **Figure S3.**  $\mu$ -XRF heat maps for Se, Ca, and Fe distribution. Hot spots where  $\mu$ -XANES data was  
 147 collected are shown as circles. A) Hotspot Se\_4 from sample 2S. B) Hotspots 12\_001 and 12\_002  
 148 for sample 12. C) Hotspot 12\_003 for sample 12. D) Hotspot 9\_001 from sample 9.

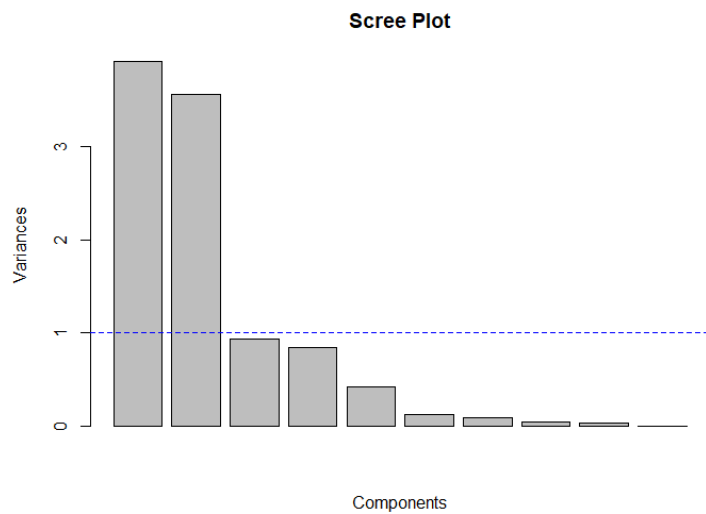

149  
150 **Figure S4.** Scree plot of principal components, with components above the blue line representing  
151 significant components capturing a majority of the variability of the data.  
152



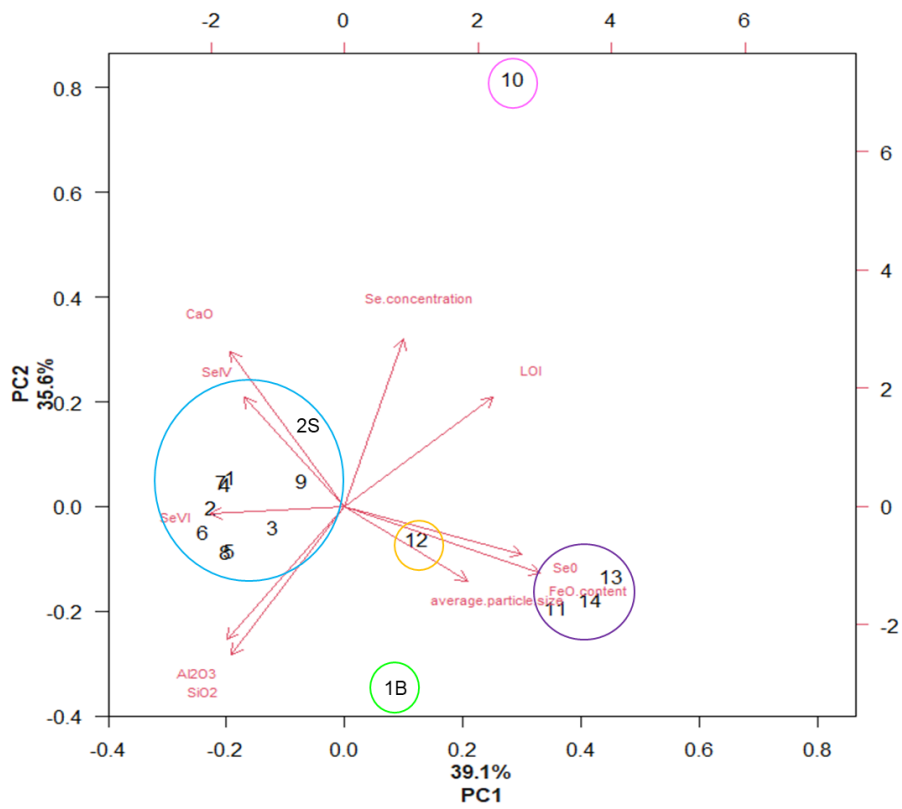

153  
 154 **Figure S5.** Biplot of PCs 1 and 2 with 39.1% and 35.6% of the variance. Scores are presented in  
 155 the right and top axes while loadings are presented in the left and bottom axes. Samples are black  
 156 numbers, and variables are shown in red with corresponding vectors.  
 157

158 **References**

- 159  
160 (1) *A Language and Environment for Statistical Computing*; Vienna, Austria, 2020. . [https://www.r-](https://www.r-project.org/)  
161 [project.org/](https://www.r-project.org/) (accessed).  
162 (2) Holland, S. *Principal Component Analysis*. 2022.  
163 <http://strata.uga.edu/8370/lecturenotes/principalComponents.html> (accessed).  
164 (3) Garcia, E.; Liu, P.; Sanchez, J.; Lee, S.; Wang, Q.; Wen, Y.; Shivaprakash, S.; Burns, S.; Tang, Y. A  
165 survey study on arsenic speciation in coal fly ash and insights into the role of coal combustion conditions.  
166 *Applied Geochemistry* **2024**, *170*, 106095. DOI: <https://doi.org/10.1016/j.apgeochem.2024.106095>.  
167 (4) Renew, J. E.; Huang, C.-H.; Burns, S. E.; Carrasquillo, M.; Sun, W.; Ellison, K. M. Immobilization of  
168 Heavy Metals by Solidification/Stabilization of Co-Disposed Flue Gas Desulfurization Brine and Coal  
169 Fly Ash. *Energy & Fuels* **2016**, *30* (6), 5042-5051. DOI: 10.1021/acs.energyfuels.6b00321.  
170
